# Supplementary material
Source: publisher site journal article supplement (https://www.dovepress.com/article/456995)
Supplement: Supplementary file 1 [file get_supplementary_file.php]

Table S1 Linear associations between SNPs and OSA-related parameters in mild OSA

| **SNP** |  | AHI | Minimum SaO2 | ODI | obstructive AHI | CT90 | REM-AHI | NREM-AHI | MAI |
| --- | --- | --- | --- | --- | --- | --- | --- | --- | --- |
| **rs2815765** | **β** | 0.027 | -0.025 | **0.261** | 0.115 | 0.113 | -0.031 | 0.089 | 0.082 |
| **P** | 0.640 | 0.665 | **0.000** | 0.047 | 0.049 | 0.595 | 0.129 | 0.159 |
| **P***BH* | 0.665 | 0.665 | **0.000** | 0.131 | 0.131 | 0.665 | 0.254 | 0.254 |
| **rs2070902** | **β** | -0.035 | -0.048 | -0.001 | 0.060 | 0.034 | 0.115 | 0.048 | -0.006 |
| **P** | 0.562 | 0.435 | 0.981 | 0.336 | 0.579 | 0.069 | 0.449 | 0.922 |
| **P***BH* | 0.772 | 0.772 | 0.981 | 0.772 | 0.772 | 0.552 | 0.772 | 0.981 |
| **rs13395467** | **β** | -0.016 | 0.013 | -0.034 | 0.023 | 0.077 | 0.003 | 0.037 | -0.007 |
| **P** | 0.785 | 0.820 | 0.545 | 0.697 | 0.181 | 0.958 | 0.533 | 0.902 |
| **P***BH* | 0.958 | 0.958 | 0.958 | 0.958 | 0.958 | 0.958 | 0.958 | 0.958 |
| **rs11677002** | **β** | -0.051 | -0.011 | -0.049 | 0.009 | -0.011 | -0.101 | 0.031 | -0.022 |
| **P** | 0.370 | 0.843 | 0.379 | 0.882 | 0.849 | 0.083 | 0.596 | 0.700 |
| **P***BH* | 0.882 | 0.882 | 0.882 | 0.882 | 0.882 | 0.664 | 0.882 | 0.882 |
| **rs950881** | **β** | 0.076 | -0.002 | 0.038 | -0.033 | -0.014 | -0.041 | 0.014 | -0.020 |
| **P** | 0.183 | 0.975 | 0.496 | 0.571 | 0.811 | 0.479 | 0.808 | 0.734 |
| **P***BH* | 0.927 | 0.975 | 0.927 | 0.927 | 0.927 | 0.927 | 0.927 | 0.927 |
| **rs2164068** | **β** | -0.044 | 0.044 | -0.011 | 0.002 | -0.031 | -0.098 | -0.097 | -0.002 |
| **P** | 0.443 | 0.439 | 0.851 | 0.974 | 0.590 | 0.095 | 0.098 | 0.979 |
| **P***BH* | 0.886 | 0.886 | 0.979 | 0.979 | 0.944 | 0.392 | 0.392 | 0.979 |
| **rs6738964** | **β** | -0.065 | -0.037 | 0.023 | -0.051 | -0.013 | 0.008 | -0.107 | -0.053 |
| **P** | 0.255 | 0.509 | 0.687 | 0.379 | 0.825 | 0.886 | 0.065 | 0.364 |
| **P***BH* | 0.758 | 0.814 | 0.886 | 0.758 | 0.886 | 0.886 | 0.520 | 0.758 |
| **rs62257549** | **β** | -0.007 | 0.004 | -0.073 | 0.038 | -0.102 | 0.163 | 0.092 | -0.057 |
| **P** | 0.897 | 0.948 | 0.194 | 0.513 | 0.077 | 0.005 | 0.113 | 0.330 |
| **P***BH* | 0.948 | 0.948 | 0.388 | 0.684 | 0.301 | 0.040 | 0.301 | 0.528 |
| **rs2030519** | **β** | -0.022 | 0.033 | -0.052 | 0.024 | 0.065 | 0.004 | 0.027 | 0.027 |
| **P** | 0.701 | 0.556 | 0.361 | 0.685 | 0.263 | 0.950 | 0.647 | 0.647 |
| **P***BH* | 0.801 | 0.801 | 0.801 | 0.801 | 0.801 | 0.950 | 0.801 | 0.801 |
| **rs12509403** | **β** | -0.013 | -0.038 | -0.024 | -0.030 | -0.044 | 0.054 | 0.112 | 0.040 |
| **P** | 0.820 | 0.507 | 0.670 | 0.604 | 0.440 | 0.361 | 0.054 | 0.497 |
| **P***BH* | 0.820 | 0.766 | 0.766 | 0.766 | 0.766 | 0.766 | 0.432 | 0.766 |
| **rs148505069** | **β** | 0.126 | -0.044 | 0.124 | 0.031 | -0.016 | 0.017 | 0.039 | 0.026 |
| **P** | 0.029 | 0.446 | 0.030 | 0.604 | 0.779 | 0.778 | 0.511 | 0.663 |
| **P***BH* | 0.120 | 0.779 | 0.120 | 0.779 | 0.779 | 0.779 | 0.779 | 0.779 |
| **rs7717955** | **β** | -0.048 | -0.015 | -0.012 | -0.078 | -0.046 | -0.004 | -0.013 | -0.017 |
| **P** | 0.396 | 0.784 | 0.836 | 0.174 | 0.425 | 0.947 | 0.824 | 0.769 |
| **P***BH* | 0.947 | 0.947 | 0.947 | 0.947 | 0.947 | 0.947 | 0.947 | 0.947 |
| **rs1438673** | **β** | 0.048 | -0.062 | 0.031 | 0.077 | -0.026 | 0.020 | -0.055 | -0.015 |
| **P** | 0.397 | 0.273 | 0.584 | 0.178 | 0.649 | 0.736 | 0.340 | 0.794 |
| **P***BH* | 0.794 | 0.794 | 0.794 | 0.794 | 0.794 | 0.794 | 0.794 | 0.794 |
| **rs9648346** | **β** | -0.055 | 0.126 | -0.140 | 0.008 | -0.041 | -0.022 | 0.032 | -0.045 |
| **P** | 0.336 | 0.025 | 0.012 | 0.893 | 0.478 | 0.708 | 0.579 | 0.443 |
| **P***BH* | 0.765 | 0.100 | 0.096 | 0.893 | 0.765 | 0.809 | 0.772 | 0.765 |
| **rs7824993** | **β** | 0.028 | 0.081 | -0.004 | 0.024 | 0.034 | -0.007 | -0.026 | -0.039 |
| **P** | 0.620 | 0.158 | 0.945 | 0.682 | 0.562 | 0.900 | 0.656 | 0.511 |
| **P***BH* | 0.909 | 0.909 | 0.945 | 0.909 | 0.909 | 0.945 | 0.909 | 0.909 |
| **rs6470578** | **β** | 0.043 | 0.053 | 0.103 | 0.014 | 0.010 | -0.013 | 0.014 | -0.078 |
| **P** | 0.452 | 0.353 | 0.068 | 0.810 | 0.858 | 0.819 | 0.815 | 0.180 |
| **P***BH* | 0.858 | 0.858 | 0.544 | 0.858 | 0.858 | 0.858 | 0.858 | 0.720 |
| **rs2519093** | **β** | -0.048 | 0.074 | -0.083 | -0.056 | -0.012 | -0.099 | -0.019 | 0.019 |
| **P** | 0.393 | 0.186 | 0.137 | 0.331 | 0.831 | 0.089 | 0.749 | 0.741 |
| **P***BH* | 0.629 | 0.496 | 0.496 | 0.629 | 0.831 | 0.496 | 0.831 | 0.831 |
| **rs11256017** | **β** | -0.077 | 0.038 | 0.007 | -0.056 | -0.009 | 0.021 | 0.123 | 0.070 |
| **P** | 0.180 | 0.502 | 0.907 | 0.336 | 0.871 | 0.720 | 0.036 | 0.237 |
| **P***BH* | 0.632 | 0.803 | 0.907 | 0.672 | 0.907 | 0.907 | 0.288 | 0.632 |
| **rs7936323** | **β** | 0.026 | 0.119 | -0.046 | -0.078 | -0.108 | 0.036 | -0.065 | 0.101 |
| **P** | 0.640 | 0.033 | 0.407 | 0.175 | 0.057 | 0.533 | 0.262 | 0.079 |
| **P***BH* | 0.640 | 0.211 | 0.543 | 0.350 | 0.211 | 0.609 | 0.419 | 0.211 |
| **rs28361986** | **β** | 0.007 | -0.038 | 0.033 | 0.009 | 0.035 | 0.077 | 0.094 | 0.127 |
| **P** | 0.900 | 0.503 | 0.557 | 0.873 | 0.547 | 0.191 | 0.110 | 0.030 |
| **P***BH* | 0.900 | 0.743 | 0.743 | 0.900 | 0.743 | 0.509 | 0.440 | 0.240 |
| **rs2461475** | **β** | -0.001 | 0.069 | 0.006 | 0.022 | 0.000 | -0.100 | 0.004 | 0.099 |
| **P** | 0.982 | 0.225 | 0.912 | 0.702 | 0.997 | 0.085 | 0.944 | 0.091 |
| **P***BH* | 0.997 | 0.600 | 0.997 | 0.997 | 0.997 | 0.364 | 0.997 | 0.364 |
| **rs7328203** | **β** | 0.096 | -0.010 | 0.084 | 0.075 | 0.006 | -0.061 | -0.092 | -0.010 |
| **P** | 0.093 | 0.863 | 0.136 | 0.195 | 0.920 | 0.293 | 0.113 | 0.862 |
| **P***BH* | 0.363 | 0.920 | 0.363 | 0.390 | 0.920 | 0.469 | 0.363 | 0.920 |
| **rs61977073** | **β** | 0.024 | 0.021 | -0.005 | -0.027 | -0.076 | 0.058 | 0.052 | -0.010 |
| **P** | 0.669 | 0.708 | 0.936 | 0.646 | 0.186 | 0.327 | 0.376 | 0.865 |
| **P***BH* | 0.936 | 0.936 | 0.936 | 0.936 | 0.936 | 0.936 | 0.936 | 0.936 |
| **rs111371454** | **β** | 0.029 | -0.045 | -0.005 | 0.010 | -0.032 | 0.113 | **0.163** | -0.077 |
| **P** | 0.610 | 0.425 | 0.925 | 0.861 | 0.572 | 0.054 | **0.005** | 0.186 |
| **P***BH* | 0.813 | 0.813 | 0.925 | 0.925 | 0.813 | 0.216 | **0.040** | 0.496 |
| **rs10519067** | **β** | 0.098 | 0.031 | 0.047 | 0.079 | 0.047 | -0.012 | 0.003 | -0.032 |
| **P** | 0.085 | 0.584 | 0.404 | 0.172 | 0.420 | 0.833 | 0.954 | 0.580 |
| **P***BH* | 0.680 | 0.779 | 0.779 | 0.688 | 0.779 | 0.952 | 0.954 | 0.779 |
| **rs12939457** | **β** | 0.084 | -0.009 | 0.103 | 0.113 | 0.100 | -0.014 | 0.029 | -0.042 |
| **P** | 0.138 | 0.880 | 0.066 | 0.050 | 0.079 | 0.816 | 0.616 | 0.475 |
| **P***BH* | 0.276 | 0.880 | 0.211 | 0.211 | 0.211 | 0.880 | 0.821 | 0.760 |
| **rs11671925** | **β** | 0.070 | 0.050 | -0.046 | -0.022 | -0.068 | 0.015 | 0.058 | -0.037 |
| **P** | 0.229 | 0.391 | 0.420 | 0.715 | 0.251 | 0.796 | 0.328 | 0.533 |
| **P***BH* | 0.672 | 0.672 | 0.672 | 0.796 | 0.672 | 0.796 | 0.672 | 0.711 |

SNP, single-nucleotide polymorphism; AHI, apnea-hypopnea index; SaO2, oxygen saturation; ODI, oxygen desaturation index; CT90, cumulative time percentage with SpO2 < 90%; REM-AHI, number of AHI per hour of rapid eye movement (REM) sleep; NREM-AHI, number of AHI per hour of non-REM (NREM) sleep; MAI, micro-arousal index.

β and P were adjusted for age, BMI, smoking, and alcohol consumption when multiple linear regression models were adopted. P*BH* after Benjamini–Hochberg (BH) multiple testing correction.

Significant results are shown in bold.

Table S2 Linear associations between SNPs and OSA-related parameters in moderate OSA

| **SNP** |  | AHI | Minimum SaO2 | ODI | obstructive AHI | CT90 | REM-AHI | NREM-AHI | MAI |
| --- | --- | --- | --- | --- | --- | --- | --- | --- | --- |
| **rs2815765** | **β** | -0.007 | 0.006 | -0.011 | 0.009 | -0.034 | -0.015 | -0.036 | -0.013 |
| **P** | 0.827 | 0.106 | 0.470 | 0.291 | 0.160 | 0.284 | 0.620 | 0.192 |
| **P***BH* | 0.827 | 0.466 | 0.627 | 0.466 | 0.466 | 0.466 | 0.709 | 0.466 |
| **rs2070902** | **β** | -0.015 | 0.056 | 0.025 | -0.037 | 0.049 | -0.038 | 0.018 | 0.048 |
| **P** | 0.674 | 0.106 | 0.470 | 0.291 | 0.160 | 0.284 | 0.620 | 0.192 |
| **P***BH* | 0.674 | 0.466 | 0.627 | 0.466 | 0.466 | 0.466 | 0.674 | 0.466 |
| **rs13395467** | **β** | 0.022 | -0.010 | 0.021 | -0.022 | 0.035 | -0.002 | -0.036 | -0.011 |
| **P** | 0.513 | 0.750 | 0.525 | 0.491 | 0.281 | 0.941 | 0.282 | 0.738 |
| **P***BH* | 0.840 | 0.857 | 0.840 | 0.840 | 0.840 | 0.941 | 0.840 | 0.857 |
| **rs11677002** | **β** | -0.006 | -0.014 | 0.001 | 0.000 | -0.007 | -0.039 | 0.013 | 0.006 |
| **P** | 0.848 | 0.658 | 0.986 | 0.992 | 0.833 | 0.233 | 0.686 | 0.850 |
| **P***BH* | 0.992 | 0.992 | 0.992 | 0.992 | 0.992 | 0.992 | 0.992 | 0.992 |
| **rs950881** | **β** | 0.002 | 0.025 | 0.005 | -0.007 | -0.045 | 0.012 | 0.046 | 0.000 |
| **P** | 0.950 | 0.440 | 0.876 | 0.817 | 0.162 | 0.706 | 0.170 | 0.988 |
| **P***BH* | 0.988 | 0.988 | 0.988 | 0.988 | 0.680 | 0.988 | 0.680 | 0.988 |
| **rs2164068** | **β** | 0.034 | -0.017 | -0.022 | 0.015 | **0.095** | -0.006 | 0.064 | 0.051 |
| **P** | 0.302 | 0.604 | 0.487 | 0.654 | **0.003** | 0.860 | 0.055 | 0.127 |
| **P***BH* | 0.604 | 0.747 | 0.747 | 0.747 | **0.024** | 0.860 | 0.220 | 0.339 |
| **rs6738964** | **β** | 0.047 | 0.000 | -0.022 | 0.035 | -0.024 | 0.007 | -0.035 | -0.004 |
| **P** | 0.155 | 0.997 | 0.496 | 0.283 | 0.461 | 0.824 | 0.300 | 0.901 |
| **P***BH* | 0.794 | 0.997 | 0.794 | 0.794 | 0.794 | 0.997 | 0.794 | 0.997 |
| **rs62257549** | **β** | -0.031 | -0.003 | -0.008 | -0.019 | -0.059 | -0.076 | -0.042 | -0.020 |
| **P** | 0.351 | 0.935 | 0.815 | 0.569 | 0.073 | 0.022 | 0.210 | 0.551 |
| **P***BH* | 0.702 | 0.935 | 0.931 | 0.759 | 0.292 | 0.176 | 0.560 | 0.759 |
| **rs2030519** | **β** | 0.016 | 0.001 | 0.022 | 0.001 | 0.024 | -0.020 | 0.031 | -0.072 |
| **P** | 0.633 | 0.965 | 0.500 | 0.968 | 0.453 | 0.546 | 0.359 | 0.032 |
| **P***BH* | 0.844 | 0.968 | 0.844 | 0.968 | 0.844 | 0.844 | 0.844 | 0.256 |
| **rs12509403** | **β** | -0.023 | -0.025 | -0.018 | -0.024 | 0.010 | -0.029 | 0.026 | -0.026 |
| **P** | 0.495 | 0.452 | 0.590 | 0.458 | 0.753 | 0.381 | 0.432 | 0.438 |
| **P***BH* | 0.660 | 0.660 | 0.674 | 0.660 | 0.753 | 0.660 | 0.660 | 0.660 |
| **rs148505069** | **β** | -0.012 | 0.028 | -0.035 | -0.028 | 0.032 | -0.068 | 0.023 | 0.024 |
| **P** | 0.708 | 0.393 | 0.280 | 0.400 | 0.326 | 0.041 | 0.488 | 0.488 |
| **P***BH* | 0.708 | 0.558 | 0.558 | 0.558 | 0.558 | 0.328 | 0.558 | 0.558 |
| **rs7717955** | **β** | -0.048 | 0.018 | -0.033 | -0.001 | 0.001 | 0.014 | -0.045 | -0.035 |
| **P** | 0.137 | 0.570 | 0.303 | 0.982 | 0.964 | 0.678 | 0.170 | 0.295 |
| **P***BH* | 0.606 | 0.904 | 0.606 | 0.982 | 0.982 | 0.904 | 0.606 | 0.606 |
| **rs1438673** | **β** | -0.035 | 1.590 | -0.058 | -0.055 | -0.003 | 0.005 | -0.032 | -0.020 |
| **P** | 0.277 | 0.112 | 0.070 | 0.087 | 0.916 | 0.886 | 0.331 | 0.556 |
| **P***BH* | 0.530 | 0.299 | 0.299 | 0.299 | 0.916 | 0.916 | 0.530 | 0.741 |
| **rs9648346** | **β** | 0.001 | 0.035 | 0.034 | -0.027 | -0.064 | -0.063 | -0.018 | 0.034 |
| **P** | 0.964 | 0.289 | 0.295 | 0.404 | 0.048 | 0.055 | 0.586 | 0.323 |
| **P***BH* | 0.964 | 0.517 | 0.517 | 0.539 | 0.220 | 0.220 | 0.670 | 0.517 |
| **rs7824993** | **β** | 0.010 | 0.002 | 0.033 | -0.049 | 0.043 | 0.055 | 0.049 | 0.002 |
| **P** | 0.767 | 0.955 | 0.309 | 0.131 | 0.189 | 0.092 | 0.140 | 0.944 |
| **P***BH* | 0.955 | 0.955 | 0.494 | 0.373 | 0.378 | 0.373 | 0.373 | 0.955 |
| **rs6470578** | **β** | -0.054 | -0.012 | 0.004 | -0.005 | 0.033 | -0.051 | -0.024 | -0.022 |
| **P** | 0.105 | 0.708 | 0.908 | 0.872 | 0.314 | 0.121 | 0.478 | 0.522 |
| **P***BH* | 0.484 | 0.908 | 0.908 | 0.908 | 0.835 | 0.484 | 0.835 | 0.835 |
| **rs2519093** | **β** | 0.006 | -0.058 | 0.025 | 0.060 | 0.024 | -0.038 | 0.022 | -0.007 |
| **P** | 0.856 | 0.073 | 0.429 | 0.064 | 0.454 | 0.245 | 0.508 | 0.830 |
| **P***BH* | 0.856 | 0.292 | 0.677 | 0.292 | 0.677 | 0.653 | 0.677 | 0.856 |
| **rs11256017** | **β** | 0.006 | 0.023 | -0.042 | 0.027 | 0.032 | -0.044 | 0.040 | 0.049 |
| **P** | 0.846 | 0.488 | 0.197 | 0.402 | 0.324 | 0.185 | 0.238 | 0.154 |
| **P***BH* | 0.846 | 0.558 | 0.476 | 0.536 | 0.518 | 0.476 | 0.476 | 0.476 |
| **rs7936323** | **β** | **-0.091** | -0.017 | -0.036 | 0.001 | -0.026 | 0.005 | -0.024 | -0.014 |
| **P** | **0.005** | 0.606 | 0.260 | 0.982 | 0.419 | 0.887 | 0.475 | 0.668 |
| **P***BH* | **0.040** | 0.891 | 0.891 | 0.982 | 0.891 | 0.982 | 0.891 | 0.891 |
| **rs28361986** | **β** | -0.015 | -0.018 | 0.012 | 0.010 | 0.045 | 0.061 | -0.039 | -0.030 |
| **P** | 0.648 | 0.582 | 0.710 | 0.762 | 0.173 | 0.069 | 0.247 | 0.388 |
| **P***BH* | 0.762 | 0.762 | 0.762 | 0.762 | 0.659 | 0.552 | 0.659 | 0.762 |
| **rs2461475** | **β** | -0.024 | 0.057 | 0.013 | -0.014 | 0.024 | -0.065 | 0.053 | -0.009 |
| **P** | 0.459 | 0.081 | 0.681 | 0.675 | 0.467 | 0.050 | 0.113 | 0.785 |
| **P***BH* | 0.747 | 0.301 | 0.778 | 0.778 | 0.747 | 0.301 | 0.301 | 0.785 |
| **rs7328203** | **β** | -0.017 | 0.042 | -0.035 | -0.012 | 0.016 | -0.041 | -0.017 | -0.062 |
| **P** | 0.614 | 0.197 | 0.282 | 0.709 | 0.613 | 0.213 | 0.603 | 0.067 |
| **P***BH* | 0.702 | 0.564 | 0.564 | 0.709 | 0.702 | 0.564 | 0.702 | 0.536 |
| **rs61977073** | **β** | -0.030 | 0.022 | -0.010 | -0.026 | -0.043 | -0.069 | 0.010 | -0.015 |
| **P** | 0.359 | 0.511 | 0.752 | 0.431 | 0.191 | 0.037 | 0.766 | 0.666 |
| **P***BH* | 0.766 | 0.766 | 0.766 | 0.766 | 0.764 | 0.296 | 0.766 | 0.766 |
| **rs111371454** | **β** | -0.037 | -0.006 | -0.012 | -0.036 | 0.062 | -0.041 | -0.013 | -0.015 |
| **P** | 0.260 | 0.846 | 0.702 | 0.262 | 0.056 | 0.214 | 0.692 | 0.642 |
| **P***BH* | 0.524 | 0.846 | 0.802 | 0.524 | 0.448 | 0.524 | 0.802 | 0.802 |
| **rs10519067** | **β** | 0.021 | -0.014 | -0.002 | -0.036 | 0.053 | 0.005 | -0.009 | -0.021 |
| **P** | 0.533 | 0.672 | 0.939 | 0.274 | 0.107 | 0.886 | 0.779 | 0.532 |
| **P***BH* | 0.939 | 0.939 | 0.939 | 0.939 | 0.856 | 0.939 | 0.939 | 0.939 |
| **rs12939457** | **β** | -0.009 | 0.001 | -0.002 | -0.017 | -0.010 | 0.017 | 0.002 | 0.015 |
| **P** | 0.777 | 0.976 | 0.940 | 0.605 | 0.758 | 0.598 | 0.946 | 0.655 |
| **P***BH* | 0.976 | 0.976 | 0.976 | 0.976 | 0.976 | 0.976 | 0.976 | 0.976 |
| **rs11671925** | **β** | -0.037 | -0.036 | -0.011 | -0.025 | 0.066 | -0.004 | -0.072 | -0.038 |
| **P** | 0.265 | 0.276 | 0.740 | 0.455 | 0.048 | 0.903 | 0.035 | 0.265 |
| **P***BH* | 0.442 | 0.442 | 0.846 | 0.607 | 0.192 | 0.903 | 0.192 | 0.442 |

SNP, single-nucleotide polymorphism; AHI, apnea-hypopnea index; SaO2, oxygen saturation; ODI, oxygen desaturation index; CT90, cumulative time percentage with SpO2 < 90%; REM-AHI, number of AHI per hour of REM sleep; NREM-AHI, number of AHI per hour of non-REM (NREM) sleep; MAI, micro-arousal index.

β and P were adjusted for age, BMI, smoking, and alcohol consumption when multiple linear regression models were adopted. P*BH* after Benjamini–Hochberg (BH) multiple testing correction.

Significant results are shown in bold.

Table S3 Linear associations between SNPs and OSA-related parameters in severe OSA

| **SNP** |  | AHI | Minimum SaO2 | ODI | obstructive AHI | CT90 | REM-AHI | NREM-AHI | MAI |
| --- | --- | --- | --- | --- | --- | --- | --- | --- | --- |
| **rs2815765** | **β** | 0.007 | 0.000 | 0.011 | 0.001 | -0.003 | 0.004 | 0.005 | -0.030 |
| **P** | 0.672 | 0.987 | 0.525 | 0.958 | 0.859 | 0.807 | 0.773 | 0.773 |
| **P***BH* | 0.987 | 0.987 | 0.987 | 0.987 | 0.987 | 0.987 | 0.987 | 0.987 |
| **rs2070902** | **β** | -0.012 | 0.020 | -0.008 | -0.007 | -0.009 | 0.016 | -0.018 | 0.020 |
| **P** | 0.501 | 0.284 | 0.669 | 0.722 | 0.623 | 0.381 | 0.324 | 0.297 |
| **P***BH* | 0.722 | 0.722 | 0.722 | 0.722 | 0.722 | 0.722 | 0.722 | 0.722 |
| **rs13395467** | **β** | -0.021 | 0.023 | -0.031 | -0.027 | -0.030 | -0.015 | -0.008 | -0.011 |
| **P** | 0.219 | 0.183 | 0.061 | 0.128 | 0.084 | 0.406 | 0.655 | 0.545 |
| **P***BH* | 0.350 | 0.350 | 0.336 | 0.341 | 0.336 | 0.541 | 0.655 | 0.623 |
| **rs11677002** | **β** | -0.023 | -0.004 | -0.022 | -0.043 | -0.038 | -0.010 | -0.034 | -0.030 |
| **P** | 0.175 | 0.834 | 0.200 | 0.015 | 0.028 | 0.574 | 0.055 | 0.103 |
| **P***BH* | 0.267 | 0.834 | 0.267 | 0.112 | 0.112 | 0.656 | 0.147 | 0.206 |
| **rs950881** | **β** | -0.019 | 0.028 | -0.015 | -0.009 | -0.024 | -0.019 | -0.018 | -0.006 |
| **P** | 0.003 | 0.110 | 0.371 | 0.603 | 0.165 | 0.268 | 0.297 | 0.759 |
| **P***BH* | 0.267 | 0.834 | 0.267 | 0.112 | 0.112 | 0.656 | 0.147 | 0.206 |
| **rs2164068** | **β** | 0.010 | -0.020 | 0.008 | 0.003 | 0.008 | -0.034 | 0.000 | 0.008 |
| **P** | 0.571 | 0.264 | 0.615 | 0.845 | 0.649 | 0.053 | 0.996 | 0.655 |
| **P***BH* | 0.873 | 0.873 | 0.873 | 0.966 | 0.873 | 0.424 | 0.996 | 0.873 |
| **rs6738964** | **β** | **0.050** | -0.028 | 0.027 | 0.016 | 0.034 | 0.002 | 0.029 | 0.016 |
| **P** | **0.003** | 0.113 | 0.100 | 0.352 | 0.049 | 0.904 | 0.100 | 0.372 |
| **P***BH* | **0.024** | 0.181 | 0.181 | 0.425 | 0.181 | 0.904 | 0.181 | 0.425 |
| **rs62257549** | **β** | 0.009 | 0.026 | 0.001 | 0.009 | 0.002 | 0.009 | 0.009 | -0.003 |
| **P** | 0.595 | 0.135 | 0.962 | 0.607 | 0.899 | 0.618 | 0.617 | 0.867 |
| **P***BH* | 0.962 | 0.962 | 0.962 | 0.962 | 0.962 | 0.962 | 0.962 | 0.962 |
| **rs2030519** | **β** | -0.015 | 0.018 | -0.001 | -0.007 | 0.013 | -0.008 | -0.003 | -0.006 |
| **P** | 0.361 | 0.301 | 0.941 | 0.699 | 0.441 | 0.663 | 0.853 | 0.758 |
| **P***BH* | 0.941 | 0.941 | 0.941 | 0.941 | 0.941 | 0.941 | 0.941 | 0.941 |
| **rs12509403** | **β** | **0.043** | -0.031 | 0.032 | 0.018 | **0.044** | **0.061** | **0.045** | 0.034 |
| **P** | **0.011** | 0.073 | 0.055 | 0.310 | **0.011** | **0.000** | **0.010** | 0.066 |
| **P***BH* | **0.022** | 0.083 | 0.083 | 0.310 | **0.022** | **0.000** | **0.022** | 0.083 |
| **rs148505069** | **β** | 0.005 | -0.005 | -0.012 | 0.005 | 0.007 | 0.014 | -0.011 | -0.028 |
| **P** | 0.787 | 0.780 | 0.488 | 0.771 | 0.675 | 0.424 | 0.532 | 0.127 |
| **P***BH* | 0.787 | 0.787 | 0.787 | 0.787 | 0.787 | 0.787 | 0.787 | 0.787 |
| **rs7717955** | **β** | -0.009 | 0.005 | -0.010 | -0.033 | -0.010 | -0.006 | 0.001 | 0.008 |
| **P** | 0.586 | 0.779 | 0.540 | 0.060 | 0.539 | 0.716 | 0.955 | 0.658 |
| **P***BH* | 0.890 | 0.890 | 0.890 | 0.480 | 0.890 | 0.890 | 0.955 | 0.890 |
| **rs1438673** | **β** | -0.002 | 0.004 | -0.016 | -0.024 | -0.014 | -0.011 | -0.009 | 0.009 |
| **P** | 0.906 | 0.816 | 0.341 | 0.165 | 0.411 | 0.533 | 0.617 | 0.613 |
| **P***BH* | 0.906 | 0.906 | 0.823 | 0.823 | 0.823 | 0.823 | 0.823 | 0.823 |
| **rs9648346** | **β** | -0.026 | 0.030 | -0.028 | -0.006 | -0.017 | 0.006 | 0.005 | -0.026 |
| **P** | 0.121 | 0.089 | 0.087 | 0.730 | 0.316 | 0.742 | 0.785 | 0.151 |
| **P***BH* | 0.302 | 0.302 | 0.302 | 0.785 | 0.506 | 0.785 | 0.785 | 0.302 |
| **rs7824993** | **β** | 0.003 | 0.009 | 0.001 | 0.001 | 0.016 | -0.005 | 0.003 | 0.024 |
| **P** | 0.843 | 0.604 | 0.933 | 0.968 | 0.339 | 0.793 | 0.876 | 0.198 |
| **P***BH* | 0.968 | 0.968 | 0.968 | 0.968 | 0.968 | 0.968 | 0.968 | 0.968 |
| **rs6470578** | **β** | -0.003 | 0.003 | -0.014 | 0.001 | 0.003 | -0.024 | 0.008 | -0.005 |
| **P** | 0.842 | 0.880 | 0.421 | 0.973 | 0.840 | 0.168 | 0.644 | 0.779 |
| **P***BH* | 0.973 | 0.973 | 0.973 | 0.973 | 0.973 | 0.973 | 0.973 | 0.973 |
| **rs2519093** | **β** | -0.027 | -0.005 | -0.021 | -0.021 | 0.011 | -0.014 | -0.016 | -0.015 |
| **P** | 0.107 | 0.753 | 0.204 | 0.227 | 0.534 | 0.422 | 0.345 | 0.406 |
| **P***BH* | 0.563 | 0.753 | 0.563 | 0.563 | 0.610 | 0.563 | 0.563 | 0.563 |
| **rs11256017** | **β** | 0.027 | -0.017 | 0.012 | 0.030 | 0.023 | 0.027 | 0.022 | -0.004 |
| **P** | 0.111 | 0.322 | 0.486 | 0.086 | 0.174 | 0.120 | 0.205 | 0.834 |
| **P***BH* | 0.320 | 0.429 | 0.555 | 0.320 | 0.328 | 0.320 | 0.328 | 0.834 |
| **rs7936323** | **β** | 0.008 | -0.044 | 0.017 | 0.010 | 0.029 | -0.002 | 0.003 | -0.028 |
| **P** | 0.616 | 0.012 | 0.309 | 0.558 | 0.091 | 0.912 | 0.870 | 0.132 |
| **P***BH* | 0.821 | 0.096 | 0.618 | 0.821 | 0.352 | 0.912 | 0.912 | 0.352 |
| **rs28361986** | **β** | -0.013 | -0.010 | -0.010 | 0.021 | -0.014 | 0.014 | -0.006 | -0.027 |
| **P** | 0.452 | 0.583 | 0.531 | 0.237 | 0.430 | 0.429 | 0.741 | 0.141 |
| **P***BH* | 0.666 | 0.666 | 0.666 | 0.666 | 0.666 | 0.666 | 0.741 | 0.666 |
| **rs2461475** | **β** | 0.014 | 0.011 | 0.021 | 0.006 | 0.018 | -0.013 | 0.021 | 0.053 |
| **P** | 0.418 | 0.518 | 0.216 | 0.744 | 0.294 | 0.463 | 0.236 | 0.004 |
| **P***BH* | 0.592 | 0.592 | 0.588 | 0.744 | 0.588 | 0.592 | 0.588 | 0.032 |
| **rs7328203** | **β** | 0.018 | 0.006 | 0.017 | 0.018 | -0.001 | 0.004 | 0.008 | 0.002 |
| **P** | 0.269 | 0.738 | 0.293 | 0.297 | 0.957 | 0.825 | 0.646 | 0.892 |
| **P***BH* | 0.792 | 0.957 | 0.792 | 0.792 | 0.957 | 0.957 | 0.957 | 0.957 |
| **rs61977073** | **β** | 0.010 | -0.002 | 0.014 | 0.010 | -0.001 | 0.002 | 0.000 | 0.005 |
| **P** | 0.567 | 0.889 | 0.410 | 0.576 | 0.951 | 0.920 | 0.986 | 0.775 |
| **P***BH* | 0.986 | 0.986 | 0.986 | 0.986 | 0.986 | 0.986 | 0.986 | 0.986 |
| **rs111371454** | **β** | 0.012 | -0.025 | 0.002 | 0.003 | 0.010 | 0.017 | -0.003 | -0.018 |
| **P** | 0.478 | 0.145 | 0.892 | 0.872 | 0.577 | 0.342 | 0.869 | 0.315 |
| **P***BH* | 0.892 | 0.892 | 0.892 | 0.892 | 0.892 | 0.892 | 0.892 | 0.892 |
| **rs10519067** | **β** | -0.025 | -0.013 | -0.016 | -0.003 | 0.013 | -0.003 | -0.014 | -0.020 |
| **P** | 0.133 | 0.457 | 0.332 | 0.884 | 0.455 | 0.879 | 0.422 | 0.274 |
| **P***BH* | 0.609 | 0.609 | 0.609 | 0.884 | 0.609 | 0.884 | 0.609 | 0.609 |
| **rs12939457** | **β** | 0.018 | -0.017 | 0.010 | 0.015 | 0.016 | -0.002 | 0.015 | -0.020 |
| **P** | 0.276 | 0.319 | 0.550 | 0.398 | 0.339 | 0.930 | 0.381 | 0.271 |
| **P***BH* | 0.531 | 0.531 | 0.629 | 0.531 | 0.531 | 0.930 | 0.531 | 0.531 |
| **rs11671925** | **β** | -0.018 | -0.022 | -0.027 | -0.003 | -0.028 | -0.033 | -0.024 | 0.008 |
| **P** | 0.309 | 0.233 | 0.118 | 0.876 | 0.121 | 0.073 | 0.194 | 0.662 |
| **P***BH* | 0.412 | 0.373 | 0.323 | 0.876 | 0.323 | 0.323 | 0.373 | 0.757 |

SNP, single-nucleotide polymorphism; AHI, apnea-hypopnea index; SaO2, oxygen saturation; ODI, oxygen desaturation index; CT90, cumulative time percentage with SpO2 < 90%; REM-AHI, number of AHI per hour of REM sleep; NREM-AHI, number of AHI per hour of non-REM (NREM) sleep; MAI, micro-arousal index.

β and P were adjusted for age, BMI, smoking, and alcohol consumption when multiple linear regression models were adopted. P*BH* after Benjamini–Hochberg (BH) multiple testing correction.

Significant results are shown in bold.

Table S4 Associations between rs12509403 and OSA according to the quartile of the OSA-related parameters in mild OSA

|  | OR (95%CI) | P | OR (95%CI) | P | OR (95%CI) | P | OR (95%CI) | P |
| --- | --- | --- | --- | --- | --- | --- | --- | --- |
|  | **Minimum SaO2** | | **ODI** | | **Obstructive AHI** | | **CT90** | |
| Q1 |  | - | 1 | - |  | - | 1 | - |
| Q2 | 1.536（0.671-3.516） | 0.310 | 0.358(0.144-0.89) | 0.021 | 0.8(0.318-2.015) | 0.636 | 0.511(0.205-1.277) | 0.151 |
| Q3 | 0.929（0.383-2.253) | 0.871 | 0.312(0.114-0.852) | 0.023 | 0.637(0.248-1.634) | 0.358 | 0.649(0.270-1.563) | 0.335 |
| Q4 | 0.592(0.211-1.661) | 0.320 | 0.668(0.283-1.574) | 0.356 | 0.823(0.336-2.014) | 0.669 | 0.595(0.234-1.512) | 0.275 |
|  | **REM-AHI** | | **NREM-AHI** | | **MAI** | |  |  |
| Q1 | 1 | - | 1 | - | 1 | - |  |  |
| Q2 | 0.512(0.192-1.367) | 0.181 | 1.065(0.435-2.609) | 0.890 | 0.801(0.307-2.090) | 0.651 |  |  |
| Q3 | 0.630(0.245-1.619) | 0.337 | 0.648(0.233-1.800) | 0.405 | 0.890(0.350-2.260) | 0.806 |  |  |
| Q4 | 0.984(0.400-2.422) | 0.972 | 1.205(0.485-2.991) | 0.688 | 1.158(0.458-2.932) | 0.756 |  |  |

OR, odds ratio; 95%CI, 95%confidence interval; AHI, apnea-hypopnea index; SaO2, oxygen saturation; ODI, oxygen desaturation index; CT90, cumulative time percentage with SpO2 < 90%; REM-AHI, number of AHI per hour of REM sleep; NREM-AHI, number of AHI per hour of non-REM (NREM) sleep; MAI, micro-arousal index.; Q, quantile. Significant results are shown in bold.

Table S5 Associations between rs12509403 and OSA according to the quartile of the OSA-related parameters in moderate OSA

|  | OR (95%CI) | P | OR (95%CI) | P | OR (95%CI) | P | OR (95%CI) | P |
| --- | --- | --- | --- | --- | --- | --- | --- | --- |
|  | **Minimum SaO2** | | **ODI** | | **Obstructive AHI** | | **CT90** | |
| Q1 |  | - | 1 | - |  | - | 1 | - |
| Q2 | 0.836(0.518-1.349) | 0.464 | 1.133(0.662-1.937) | 0.649 | 0.723(0.43-1.217) | 0.223 | 0.893(0.539-1.479) | 0.659 |
| Q3 | 0.710(0.414-1.217) | 0.213 | 1.496(0.897-2.494) | 0.122 | 0.9(0.546-1.484) | 0.680 | 0.649(0.376-1.119) | 0.120 |
| Q4 | 0.944(0.563-1.582) | 0.827 | 0.941(0.540-1.641) | 0.83 | 0.834(0.496-1.402) | 0.493 | 1.033(0.626-1.706) | 0.898 |
|  | **REM-AHI** | | **NREM-AHI** | | **MAI** | |  |  |
| Q1 | 1 | - | 1 | - | 1 | - |  |  |
| Q2 | 1.548(0.946-2.533) | 0.082 | 1.158(0.695-1.927) | 0.574 | 1.214(0.717-2.055) | 0.471 |  |  |
| Q3 | 0.742（0.427-1.292） | 0.292 | 0.978(0.581-1.646) | 0.932 | 1.081(0.628-1.860) | 0.779 |  |  |
| Q4 | 0.907（0.528-1.5560 | 0.722 | 1.017(0.601-1.721) | 0.949 | 0.854(0.485-1.503) | 0.584 |  |  |

OR, odds ratio; 95%CI, 95%confidence interval; AHI, apnea-hypopnea index; SaO2, oxygen saturation; ODI, oxygen desaturation index; CT90, cumulative time percentage with SpO2 < 90%; REM-AHI, number of AHI per hour of REM sleep; NREM-AHI, number of AHI per hour of non-REM (NREM) sleep; MAI, micro-arousal index.; Q, quantile. Significant results are shown in bold.

Table S6 Associations between rs12509403 and OSA according to the quartile of the OSA-related parameters in severe OSA

|  | OR (95%CI) | P | OR (95%CI) | P | OR (95%CI) | P | OR (95%CI) | P |
| --- | --- | --- | --- | --- | --- | --- | --- | --- |
|  | **Minimum SaO2** | | **ODI** | | **Obstructive AHI** | | **CT90** | |
| Q1 |  | - | 1 | - |  | - | 1 | - |
| Q2 | 0.840（0.641-1.101） | 0.207 | 1.019（0.762-1.362） | 0.900 | 1.176(0.887-1.560) | 0.260 | 0.787(0.591-1.049) | 0.102 |
| Q3 | 0.759（0.571-1.010） | 0.058 | 1.270（0.955-1.688） | 0.100 | 1.249(0.943-1.653) | 0.121 | 0.907(0.684-1.202) | 0.497 |
| Q4 | 0.837（0.633-1.106） | 0.210 | 1.283（0.947-1.737） | 0.107 | 1.140(0.852-1.525) | 0.377 | 1.233(0.934-1.627) | 0.140 |
|  | **REM-AHI** | | **NREM-AHI** | | **MAI** | |  |  |
| Q1 | 1 | - | 1 | - | 1 | - |  |  |
| Q2 | 1.233(0.916-1.660) | 0.167 | 0.921(0.687-1.235) | 0.584 | 0.790(0.589-1.058) | 0.114 |  |  |
| Q3 | **1.527(1.143-2.040)** | **0.004** | 1.122(0.844-1.491) | 0.427 | 0.905(0.679-1.206） | 0.496 |  |  |
| Q4 | **1.534(1.132-2.080)** | **0.006** | 1.341(1.004-1.791) | 0.047 | 1.182（0.894-1.562） | 0.241 |  |  |

OR, odds ratio; 95%CI, 95%confidence interval; AHI, apnea-hypopnea index; SaO2, oxygen saturation; ODI, oxygen desaturation index; CT90, cumulative time percentage with SpO2 < 90%; REM-AHI, number of AHI per hour of REM sleep; NREM-AHI, number of AHI per hour of non-REM (NREM) sleep; MAI, micro-arousal index.; Q, quantile. Significant results are shown in bold.
